# Supplementary material for: Heterostructures of Cut Carbon Nanotube-Filled Array of TiO2 Nanotubes for New Module of Photovoltaic Devices
Source: MDPI journal article supplement (doi:10.3390/nano12203604), 2022-10-14
Supplement: s1 [file s1]

## Supplementary Materials

# Heterostructures of Cut Carbon Nanotube-Filled Array of TiO<sub>2</sub> Nanotubes for New Module of Photovoltaic Devices

Siqi Niu <sup>1</sup>, Wenbin Yang <sup>1</sup>, Heng Wei <sup>1</sup>, Michail Danilov <sup>2</sup>, Ihor Rusetskyi <sup>2</sup>, Ketul C. Popat <sup>3,4,\*</sup>, Yao Wang <sup>1</sup>, Matt J. Kipper <sup>3,4</sup>, Laurence A. Belfiore <sup>1,4</sup> and Jianguo Tang <sup>1,\*</sup>

<sup>1</sup> Institute of Hybrid Materials, National Center of International Joint Research for Hybrid Materials Technology, National Base of International Sci. & Tech. Cooperation on Hybrid Materials, Qingdao University, 308 Ningxia Road, Qingdao 266071, China

<sup>2</sup> V.I. Vernadskii Institute of General and Inorganic Chemistry of the Ukrainian NAS, 32/34 Palladin avenue, 03142 Kyiv, Ukraine

<sup>3</sup> Department of Mechanical Engineering, Colorado State University, Fort Collins, CO 80523, USA

<sup>4</sup> Department of Chemical and Biological Engineering, Colorado State University, Fort Collins, CO 80523, USA

\* Correspondence: ketul.popat@colostate.edu (K.C.P.); tang@qdu.edu.cn (J.T.)

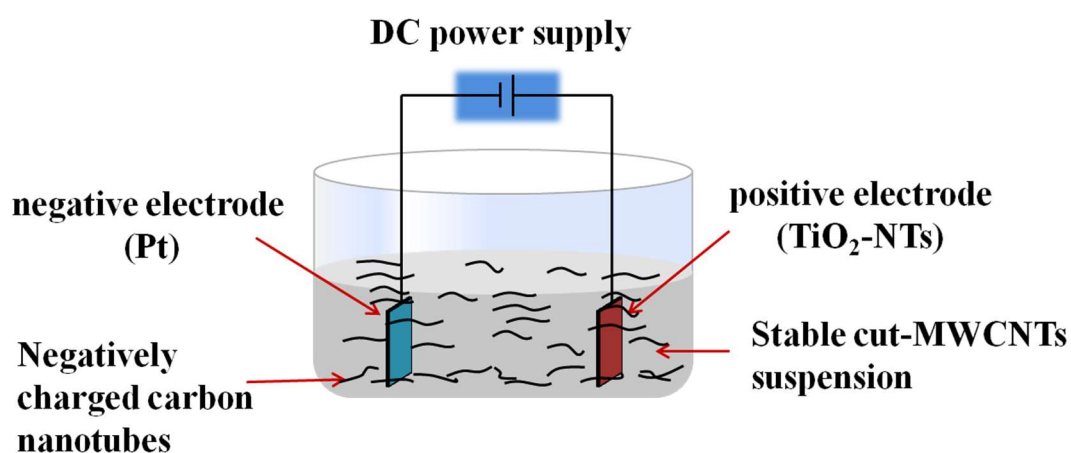

Figure S1. Schematic diagram of the electrophoresis device.

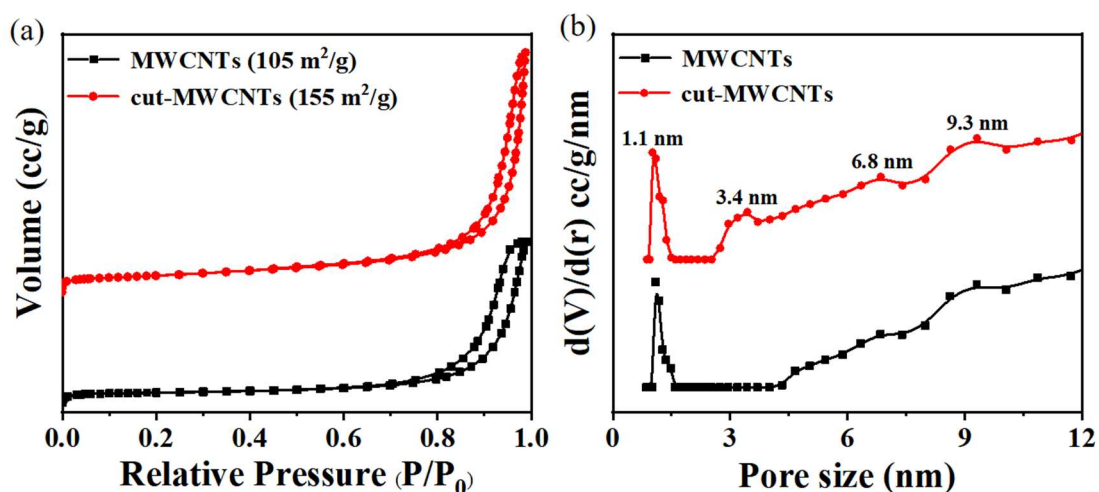

Figure S2. (a)  $\text{N}_2$  adsorption-desorption isotherms; (b) NL-DFT pore size distributions of MWCNTs and cut-MWCNTs.

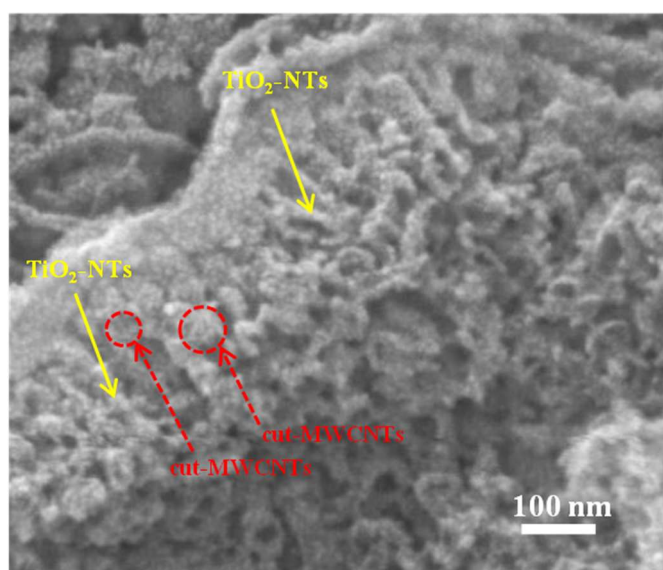

Figure S3. Cross-sectional SEM image of the  $\text{TiO}_2\text{-NTs@cut-MWCNTs}$  heterostructure.

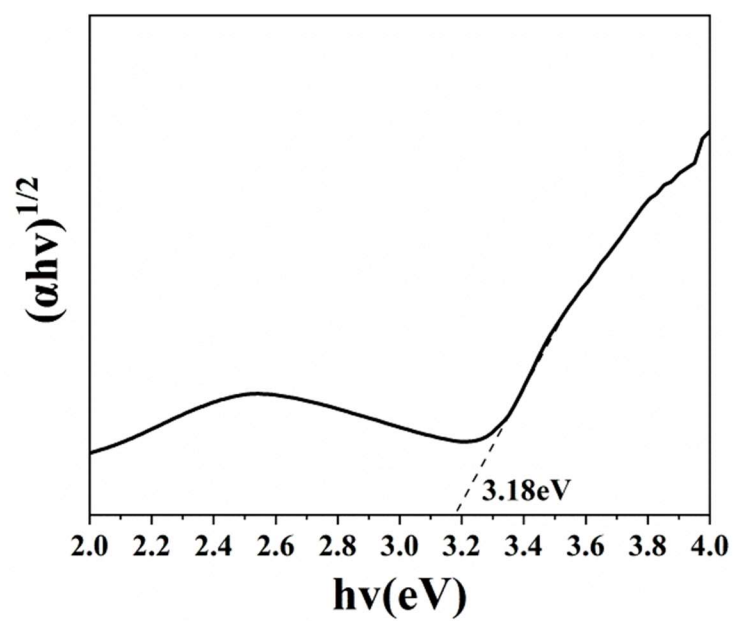

**Figure S4.** Kubelka-Munk function for band gap estimation of TiO<sub>2</sub>-NTs.
